# Supplementary material for: Relationship between oxidative balance score and prostate cancer: a cross-sectional study of NHANES, 1999–2010
Source: HighWire-hosted journal article supplement (doi:10.1136/bmjopen-2024-084700), 2024-09-01
Supplement: bmjopen-2024-084700supp004_data_supplement.pdf [file bmjopen-2024-084700supp004_data_supplement.pdf]

**Supplementary Table 4** Weighted Logistic Regression Analysis Demonstrating the Associations Between OBS and Patients Diagnosed Exclusively with PCa

| OBS      | Model 1            | P for trend | Model 2            | P for trend | Model 3             | P for trend |
|----------|--------------------|-------------|--------------------|-------------|---------------------|-------------|
|          | OR 95%CI           |             | OR 95%CI           |             | OR 95%CI            |             |
| Q1       | Ref                | 0.517       | Ref                | 0.022       | Ref                 | 0.008       |
| Q2       | 1.046(0.687,1.592) |             | 1.146(0.727,1.808) |             | 1.328(0.793, 2.223) |             |
| Q3       | 1.023(0.669,1.566) |             | 1.291(0.832,2.004) |             | 1.661(0.927, 2.977) |             |
| Q4       | 1.167(0.767,1.776) |             | 1.749(1.072,2.854) |             | 2.737(1.304, 5.746) |             |
| Continue | 1.008(0.987,1.029) |             | 1.146(1.131,1.160) |             | 1.141(1.124, 1.158) |             |

OBS, oxidative balance score; PCa, prostate cancer; OR, odds ratio; CI, confidence interval.

Model 1: unadjusted.

Model 2: adjusted for age group, race,marital status,education level and family income.

Model 3: Additionally, adjusted for CRP, total energy intake, protein, carbohydrate, cholesterol, hypertension and diabetes mellitus.
